# Supplementary material for: Precipitation of Calcium Phosphates and Calcium Carbonates in the Presence of Differently Charged Liposomes
Source: MDPI journal article supplement (doi:10.3390/min12020208), 2022-02-06
Supplement: s1 [file s1]

## Supporting information for:

### **Precipitation of calcium phosphates and calcium carbonates in the presence of differently charged liposomes**

Ina Erceg,<sup>1</sup> Jasminka Kontrec,<sup>2</sup> Vida Strasser,<sup>1</sup> Atiđa Selmani,<sup>1</sup> Darija Domazet Jurašin,<sup>1</sup>  
Marija Ćurlin,<sup>3</sup> Branka Njegić Džakula,<sup>2</sup> Nives Matijaković Mlinarić,<sup>2</sup> Suzana Šegota,<sup>1</sup>  
Daniel Mark Lyons,<sup>4</sup> Damir Kralj<sup>2,\*</sup> and Maja Dutour Sikirić<sup>1,\*</sup>

<sup>1</sup> Laboratory for biocolloids and surface chemistry, Division of Physical Chemistry, Ruđer Bošković Institute, Bijenička cesta 54, 10000 Zagreb, Croatia

<sup>2</sup> Laboratory for Precipitation Processes, Division of Materials Chemistry, Ruđer Bošković Institute, Bijenička cesta 54, 10000 Zagreb, Croatia

<sup>3</sup> Department of histology and embryology, School of Medicine, University of Zagreb, Croatia, 10000 Zagreb, Croatia

<sup>4</sup> Center for Marine Research, Ruđer Bošković Institute, Giordano Pagliaga 5, 5210 Rovinj, Croatia

\*To whom correspondence should be addressed:

Maja Dutour Sikirić  
Laboratory for biocolloids and surface chemistry  
Division of Physical Chemistry  
Ruđer Bošković Institute  
Bijenička cesta 54  
10000 Zagreb, Croatia  
tel: +385 1 456 0941  
e-mail: [sikiric@irb.hr](mailto:sikiric@irb.hr)

Damir Kralj  
Laboratory for precipitation processes  
Division of Materials Chemistry  
Ruđer Bošković Institute  
Bijenička cesta 54  
10000 Zagreb, Croatia  
tel: +385 1 4561 900  
e-mail: [kralj@irb.hr](mailto:kralj@irb.hr)

### Content of listed material:

**Figure S1.** Molecular structure of the lipids used in this study for the preparation of the liposomes with different surface charge.

**Figure S2.** FTIR spectra of 1,2-dimyristoyl-sn-glycero-3-phosphocholine (DMPC).

**Table S1.** Assignment of IR bands in the FTIR spectra of 1,2-dimyristoyl-sn-glycero-3-phosphocholine (DMPC).

**Figure S3.** FTIR spectra of 1,2-dimyristoyl-sn-glycero-3-phospho-L-serine (DMPS).

**Table S2.** Assignment of IR bands in the FTIR spectra of 1,2-dimyristoyl-sn-glycero-3-phospho-L-serine (DMPS).

**Figure S4.** FTIR spectra of 1,2-dioleoyl-sn-glycero-3-ethylphosphocholine (EPC).

**Table S3.** Assignment of IR bands in the FTIR spectra of 1,2-dioleoyl-sn-glycero-3-ethylphosphocholine (EPC).

**Table S4.** Hydrodynamic diameter ( $d_h$ ) and zeta potential ( $\zeta$ ) of liposomes

**Figure S5.** TEM micrographs and size distribution of ACP particles formed in control system and in the presence of DMPC and DMPS liposomes in spontaneous precipitation experiment.

**Table S5.** Assignment of IR bands in the FTIR spectra of precipitate formed after 60 min in calcium phosphate control system.

**Table S6.** Assignment of IR bands in the FTIR spectra of precipitate formed after 60 min in calcium phosphate system containing DMPC liposomes.

**Table S7.** Assignment of IR bands in the FTIR spectra of precipitate formed after 60 min in calcium phosphate system containing DMPS liposomes.

**Table S8.** Assignment of IR bands in the FTIR spectra of precipitate formed after 60 min in calcium phosphate system containing EPC liposomes.

**Table S9.** Assignment of IR bands in the FTIR spectra of precipitate formed after 10 min in calcium carbonate control system.

**Table S10.** Assignment of IR bands in the FTIR spectra of precipitate formed after 10 min in calcium carbonate system containing DMPC liposomes.

**Table S11.** Assignment of IR bands in the FTIR spectra of precipitate formed after 10 min in calcium carbonate system containing DMPS liposomes.

**Table S12.** Assignment of IR bands in the FTIR spectra of precipitate formed after 10 min in calcium carbonate system containing EPC liposomes.

**Figure S6.** Representative pH vs. time curve of  $\text{CaCO}_3$  spontaneous precipitation experiments.

**Figure S7.** PXRD patterns of the precipitate formed after 10 minutes reaction time in  $\text{CaCO}_3$  spontaneous precipitation experiments.

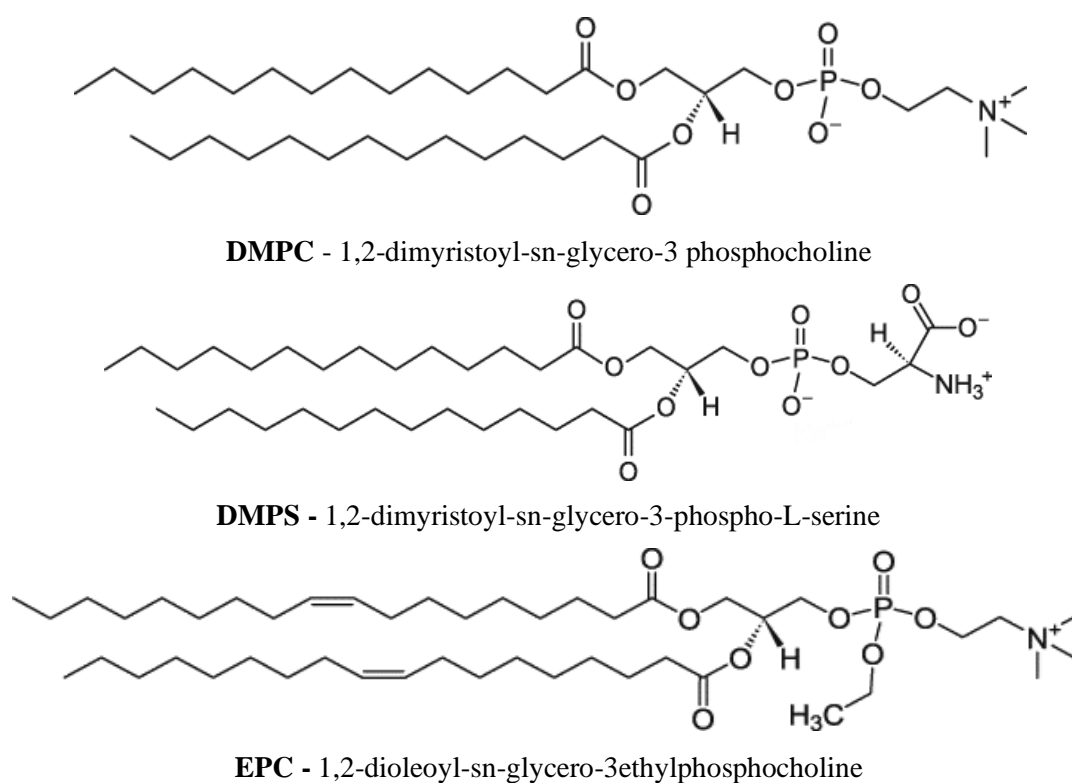

**Figure S1.** Molecular structure of the lipids used in this study for the preparation of the liposomes with different surface charge: DMPC is zwitterionic, DMPS is negatively charged and EPC is positively charged at given experimental conditions.

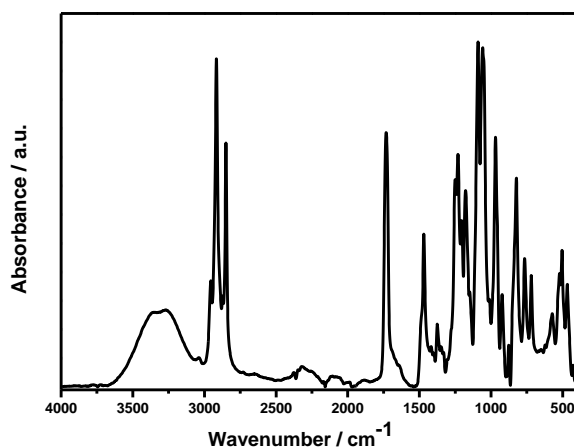

**Figure S2.** FTIR spectrum of 1,2-dimyristoyl-sn-glycero-3-phosphocholine (DMPC).

**Table S1.** Assignment of IR bands in the FTIR spectrum of 1,2-dimyristoyl-sn-glycero-3-phosphocholine (DMPC).

| Wavenumber / cm <sup>-1</sup> | Band assignment <sup>a</sup>                 |
|-------------------------------|----------------------------------------------|
| 3659 – 3040                   | O-H stretching mode                          |
| 2960                          | C-H asymmetric stretching (CH <sub>3</sub> ) |
| 2914                          | C-H asymmetric stretching (CH <sub>2</sub> ) |
| 2851                          | C-H symmetric stretching (CH <sub>2</sub> )  |
| 1728                          | C=O stretching mode                          |
| 1471                          | C-O-H deformation in plane                   |
| 1377                          | CH <sub>3</sub> symmetric deformation        |
| 1251                          | C-O stretching mode                          |
| 1229                          | P=O stretching mode                          |
| 1178                          | C-N stretching mode                          |
| 1099, 1055, 967               | P-C-O asymmetric stretching                  |
| 921                           | C-O-H out of plane deformation               |
| 821, 763                      | P-C-O symmetric stretching                   |
| 715                           | CH <sub>2</sub> rocking deformation          |

<sup>a</sup>P. J. Larkin, IR and Raman spectroscopy: Principles and Spectral Interpretation, Elsevier, Amsterdam, 2011.

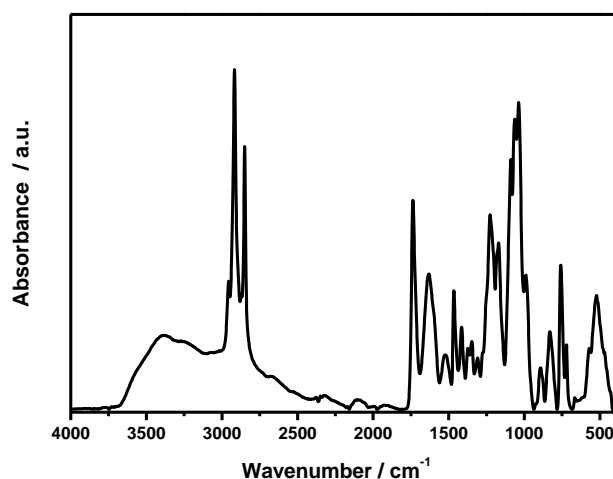

**Figure S3.** FTIR spectrum of 1,2-dimyristoyl-sn-glycero-3-phospho-L-serine (DMPS).

**Table S2.** Assignment of IR bands in the FTIR spectrum of 1,2-dimyristoyl-sn-glycero-3-phospho-L-serine (DMPS).

| Wavenumber / cm <sup>-1</sup> | Band assignement <sup>a</sup>                |
|-------------------------------|----------------------------------------------|
| 3671 – 3129                   | O-H stretching mode                          |
| 3282 – 3129                   | N-H stretching mode                          |
| 2955                          | C-H asymmetric stretching (CH <sub>3</sub> ) |
| 2913                          | C-H asymmetric stretching (CH <sub>2</sub> ) |
| 2850                          | C-H symmetric stretching (CH <sub>2</sub> )  |
| 2657                          | N-CH <sub>2</sub> stretching mode            |
| 1734                          | C=O stretching mode                          |
| 1628                          | NH <sub>2</sub> scissors deformation         |
| 1524                          | CH <sub>3</sub> asymmetric deformation       |
| 1470                          | C-O-H deformation in plane                   |
| 1413                          | CH <sub>2</sub> scissoring deformation       |
| 1370                          | CH <sub>3</sub> symmetric deformation        |
| 1307                          | CH <sub>2</sub> wagging deformation          |
| 1229                          | P=O stretching                               |
| 1171                          | C-O stretching                               |
| 1093                          | C-N stretching                               |
| 1056, 1040, 994               | P-C-O asymmetric stretching                  |
| 894                           | C-O-H out of plane deformation               |
| 836                           | NH <sub>2</sub> wagging deformation          |
| 757, 721                      | P-C-O symmetric stretching                   |

<sup>a</sup>P. J. Larkin, IR and Raman spectroscopy: Principles and Spectral Interpretation, Elsevier, Amsterdam, 2011.

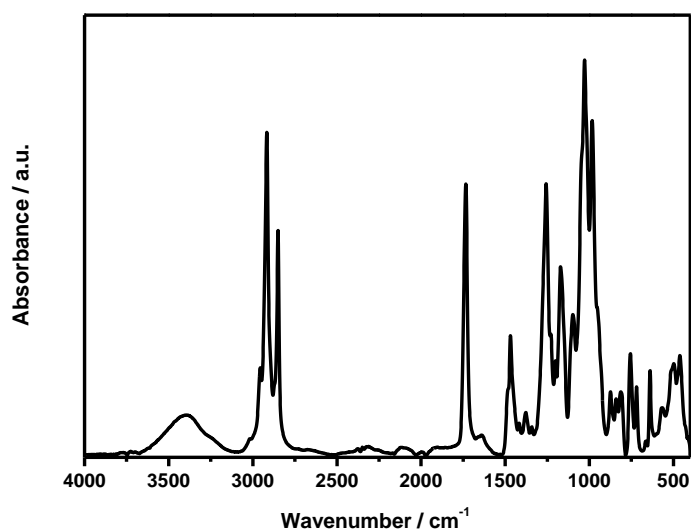

**Figure S4.** FTIR spectrum of 1,2-dioleoyl-sn-glycero-3-ethylphosphocholine (EPC).

**Table S3.** Assignment of IR bands in the FTIR spectrum of 1,2-dioleoyl-sn-glycero-3-ethylphosphocholine (EPC).

| Wavenumber / cm <sup>-1</sup> | Band assignment <sup>a</sup>                 |
|-------------------------------|----------------------------------------------|
| 3674 – 3130                   | O-H stretching mode                          |
| 3018                          | =C-H stretching mode                         |
| 2956                          | C-H asymmetric stretching (CH <sub>3</sub> ) |
| 2918                          | C-H asymmetric stretching (CH <sub>2</sub> ) |
| 2849                          | C-H symmetric stretching (CH <sub>2</sub> )  |
| 1734                          | C=O stretching mode                          |
| 1638                          | C=C stretching mode                          |
| 1460                          | CH <sub>2</sub> scissoring deformation       |
| 1419                          | =C-H deformation in plane                    |
| 1377                          | CH <sub>3</sub> symmetric deformation        |
| 1340                          | CH <sub>2</sub> wagging deformation          |
| 1245                          | C-O stretching                               |
| 1171                          | P=O stretching                               |
| 1092                          | C-N stretching                               |
| 1020, 983                     | P-C-O asymmetric stretching                  |
| 878, 834, 815                 | P-C-O symmetric stretching                   |

<sup>a</sup> P. J. Larkin, IR and Raman spectroscopy: Principles and Spectral Interpretation, Elsevier, Amsterdam, 2011.

**Table S4.** Hydrodynamic diameter ( $d_h$ ) and zeta potential ( $\zeta$ ) of liposomes dispersed in phosphate ( $c(\text{Na}_2\text{HPO}_4) = 7 \text{ mmol dm}^{-3}$ ) or carbonate ( $c(\text{NaHCO}_3) = 40 \text{ mmol dm}^{-3}$ ) solution at 25 °C,  $\gamma(\text{lipid}) = 50.0 \text{ ppm}$ .

| Liposomes   | $\text{PO}_4^{3-}$ |         |                     | $\text{CO}_3^{2-}$ |         |                     |
|-------------|--------------------|---------|---------------------|--------------------|---------|---------------------|
|             | $d_h / \text{nm}$  | Vol / % | $\zeta / \text{mV}$ | $d_h / \text{nm}$  | Vol / % | $\zeta / \text{mV}$ |
| <b>DMPC</b> | $1610.6 \pm 304.8$ | 80      | $-0.6 \pm 0.4$      | $1773.2 \pm 204.9$ | 87.5    | $-1.8 \pm 0.6$      |
|             | $4877.8 \pm 952.4$ | 20      |                     | $5193.8 \pm 263.1$ | 12.5    |                     |
| <b>DMPS</b> | $231.0 \pm 80.8$   | 100     | $-100.6 \pm 3.4$    | $1093.7 \pm 155.5$ | 100     | $-84.4 \pm 8.9$     |
| <b>EPC</b>  | $44.8 \pm 14.6$    | 40.4    | $56.6 \pm 3.9$      | $69.1 \pm 17.3$    | 38.8    | $37.3 \pm 4.5$      |
|             | $308.1 \pm 35.7$   | 59.6    |                     | $240.2 \pm 25.0$   | 62.2    |                     |



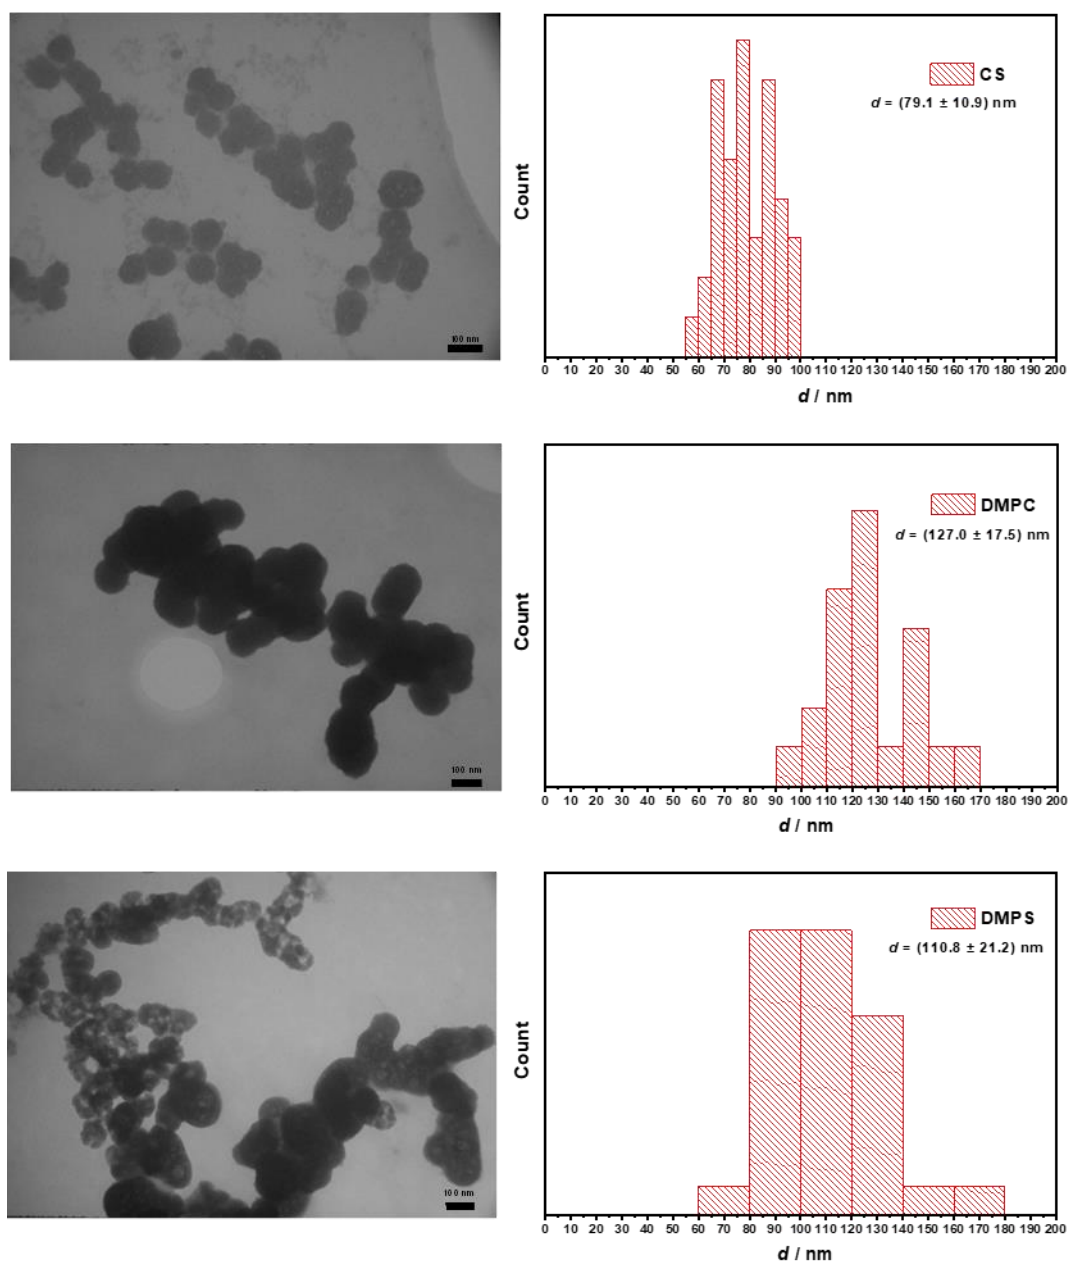

**Figure S5.** TEM micrographs and size distribution of ACP particles formed in control system and in the presence of DMPC and DMPS liposomes ( $\gamma(\text{lipid}) = 25.0 \text{ ppm}$ ).  $c_i(\text{Ca}) = c_i(\text{PO}_4) = 3.5 \text{ mmol dm}^{-3}$ ,  $\text{pH}_i = 7.4$ ,  $\theta / ^\circ\text{C} = 25 \pm 0.1$ .

**Table S5.** Assignment of IR bands in the FTIR spectra of precipitate formed after 60 min in calcium phosphate control system.  $c_i(\text{Ca}) = c_i(\text{PO}_4) = 3.5 \text{ mmol dm}^{-3}$ ,  $\text{pH}_i = 7.4$ ,  $\theta/^\circ\text{C} = 25 \pm 0.1$ .

| Wavenumber / $\text{cm}^{-1}$ | Band assignment                                                                          | Reference |
|-------------------------------|------------------------------------------------------------------------------------------|-----------|
| 3665 – 2546                   | O-H stretching mode of $\text{H}_2\text{O}$                                              | a         |
| 2337                          | $\text{CO}_2$                                                                            | b         |
| 1650                          | O-H-O bending of $\text{H}_2\text{O}$                                                    | a         |
| 1282                          | $\text{HPO}_3^{2-}$                                                                      |           |
|                               | $\nu_{3a}$ triply degenerate asymmetric stretching mode of $\text{PO}_4^{3-}$ (P–O bond) | a         |
| 1114                          |                                                                                          |           |
|                               | $\nu_{3c}$ triply degenerate asymmetric stretching mode of $\text{PO}_4^{3-}$ (P–O bond) | a         |
| 1020                          |                                                                                          |           |
|                               | $\nu_1$ nondegenerate symmetric stretching mode of $\text{PO}_4^{3-}$ (P–O bond)         | a         |
| 956                           |                                                                                          |           |
|                               | $\text{HPO}_4^{2-}$                                                                      | c         |
| 856                           |                                                                                          |           |
|                               | $\nu_{4a}$ triply degenerate bending mode of $\text{PO}_4^{3-}$ (O–P–O bond)             | a         |
| 594                           |                                                                                          |           |
|                               | $\nu_{4b}$ triply degenerate bending mode of $\text{PO}_4^{3-}$ (O–P–O bond)             | a         |
| 553                           |                                                                                          |           |
|                               | $\nu_2$ doubly degenerate bending mode of $\text{PO}_4^{3-}$ (O–P–O bond)                | a         |
| 469                           |                                                                                          |           |

<sup>a</sup>Koutsopoulos, S.; *J. Biomed. Mater. Res.*, 2002, 62, 600 – 612

<sup>b</sup>Gremlich, H. In: *Infrared and Raman Spectroscopy*, VCH Publishers, New York, 2008.

<sup>c</sup>Mochales, C; Wilson, R. M.; Dowker, S. E.; Ginebra, M. P.; *J. Alloy Compd.*, 2011, 509, 7389-7394

**Table S6.** Assignment of IR bands in the FTIR spectra of precipitate formed after 60 min in calcium phosphate system containing DMPC liposomes.  $c_i(\text{Ca}) = c_i(\text{PO}_4) = 3.5 \text{ mmol dm}^{-3}$ ,  $\text{pH}_i = 7.4$ ,  $\theta / ^\circ\text{C} = 25 \pm 0.1$ .

| Wavenumber / $\text{cm}^{-1}$ | $\gamma$ (DMPC) / ppm |             |             |      | Band assignment |
|-------------------------------|-----------------------|-------------|-------------|------|-----------------|
|                               | 2.5                   | 6.25        | 12.5        | 25.0 |                 |
|                               | 3685 - 2600           | 3700 - 2585 | 3678 - 2632 |      |                 |
|                               | 2352                  | 2341        | 2357        | 2357 |                 |
|                               | 1654                  | 1659        | 1649        |      |                 |
|                               | 1283                  | 1283        | 1278        |      |                 |
|                               | 1130                  | 1119        | 1114        | 1113 |                 |
|                               | 1018                  | 1024        | 1019        | 1024 |                 |
|                               | 961                   | 950         | 966         | 962  |                 |
|                               | 866                   | 866         | 860         | 870  |                 |
|                               | 601                   | 595         | 601         | 596  |                 |
|                               | 559                   | 564         | 559         | 553  |                 |
|                               | 468                   | 469         | 474         | 469  |                 |

**Table S7.** Assignment of IR bands in the FTIR spectra of precipitate formed after 60 min in calcium phosphate system containing DMPS liposomes.  $c_i(\text{Ca}) = c_i(\text{PO}_4) = 3.5 \text{ mmol dm}^{-3}$ ,  $\text{pH}_i = 7.4$ ,  $\theta / ^\circ\text{C} = 25 \pm 0.1$ .

| Wavenumber / $\text{cm}^{-1}$ | $\gamma$ (DMPS) / ppm |             |             |             | Band assignment                                                              |
|-------------------------------|-----------------------|-------------|-------------|-------------|------------------------------------------------------------------------------|
|                               | 2.5                   | 6.25        | 12.5        | 25.0        |                                                                              |
|                               | 3664 - 2643           | 3635 - 2547 | 3669 - 2621 | 3642 - 2590 |                                                                              |
|                               | 2364                  | 2352        | 2363        | 2357        |                                                                              |
|                               | 1649                  | 1648        | 1643        | 1649        |                                                                              |
|                               | 1289                  |             | 1283        | 1279        |                                                                              |
|                               | 1114                  | 1120        | 1109        | 1114        |                                                                              |
|                               | 1019                  | 1019        | 1021        | 1020        |                                                                              |
|                               | 966                   | 961         | 966         | 950         |                                                                              |
|                               | 860                   | 870         | 866         | 860         |                                                                              |
|                               | 601                   | 595         | 601         | 603         | $\nu_{4a}$ triply degenerate bending mode of $\text{PO}_4^{3-}$ (O–P–O bond) |
|                               | 553                   | 559         | 559         | 559         | $\nu_{4b}$ triply degenerate bending mode of $\text{PO}_4^{3-}$ (O–P–O bond) |
|                               | 464                   | 474         | 474         | 474         | $\nu_2$ doubly degenerate bending mode of $\text{PO}_4^{3-}$ (O–P–O bond)    |

**Table S8.** Assignment of IR bands in the FTIR spectra of precipitate formed after 60 min in calcium phosphate system containing EPC liposomes.  $c_i(\text{Ca}) = c_i(\text{PO}_4) = 3.5 \text{ mmol dm}^{-3}$ ,  $\text{pH}_i = 7.4$ ,  $\theta / ^\circ\text{C} = 25 \pm 0.1$ .

| Wavenumber / $\text{cm}^{-1}$ | $\gamma \text{ (EPC) / ppm}$ |             |             |             | Band assignment                                                              |
|-------------------------------|------------------------------|-------------|-------------|-------------|------------------------------------------------------------------------------|
|                               | 2.5                          | 6.25        | 12.5        | 25.0        |                                                                              |
|                               | 3648 - 2621                  | 3674 - 2645 | 3670 - 2710 | 3638 - 2621 |                                                                              |
|                               | 2357                         | 2353        | 2352        |             |                                                                              |
|                               | 1643                         | 1650        | 1654        | 1655        |                                                                              |
|                               | 1282                         |             | 1287        | 1277        |                                                                              |
|                               | 1120                         | 1109        | 1110        | 1110        |                                                                              |
|                               | 1014                         | 1021        | 1020        | 1010        |                                                                              |
|                               | 963                          | 956         | 952         | 952         |                                                                              |
|                               | 856                          | 872         | 868         | 872         |                                                                              |
|                               | 595                          | 599         | 606         | 595         | $\nu_{4a}$ triply degenerate bending mode of $\text{PO}_4^{3-}$ (O–P–O bond) |
|                               | 553                          | 548         | 557         | 553         | $\nu_{4b}$ triply degenerate bending mode of $\text{PO}_4^{3-}$ (O–P–O bond) |
|                               | 458                          | 469         | 464         | 458         | $\nu_2$ doubly degenerate bending mode of $\text{PO}_4^{3-}$ (O–P–O bond)    |

**Table S9.** Assignment of IR bands in the FTIR spectra of precipitate formed in control calcium carbonate system.  $c_i(\text{Ca}) = c_i(\text{CO}_3) = 20 \text{ mmol dm}^{-3}$ ,  $\text{pH}_i = 8.15$ ,  $\vartheta / ^\circ\text{C} = 25 \pm 0.1$ .

| Wavenumber / $\text{cm}^{-1}$ | Band assignment <sup>a</sup>                          |
|-------------------------------|-------------------------------------------------------|
| 1446                          | $\nu_3$ , asymmetric C-O stretching mode              |
| 1089                          | $\nu_1$ , symmetric C-O stretching mode               |
| 877                           | $\nu_2$ , $\text{CO}_3$ out of plane deformation mode |
| 746                           | $\nu_4$ , O-C-O bending (in plane deformation) mode   |

<sup>a</sup> F. A. Andersen, Lj. Brečević: Infrared spectra of amorphous and crystalline calcium carbonate, *Acta Chim. Scand.* **45** (1991) 1018-1024.

**Table S10.** Assignment of IR bands in the FTIR spectra of precipitate formed in calcium carbonate system containing DMPC liposomes.  $c_i(\text{Ca}) = c_i(\text{CO}_3) = 20 \text{ mmol dm}^{-3}$ ,  $\text{pH}_i = 8.15$ ,  $\theta / ^\circ\text{C} = 25 \pm 0.1$ .

|                               | $\gamma$ (DMPC) / ppm |             |             |             | Band assignment                                       |
|-------------------------------|-----------------------|-------------|-------------|-------------|-------------------------------------------------------|
|                               | 2.5                   | 6.25        | 12.5        | 25.0        |                                                       |
| Wavenumber / $\text{cm}^{-1}$ | 3680 - 3075           | 3675 - 3100 | 3630 - 3095 | 3610 - 3095 | O-H stretching mode of $\text{H}_2\text{O}$           |
|                               |                       |             | 2912        | 2908        | C-H asymmetric stretching ( $\text{CH}_2$ )           |
|                               |                       |             | 2847        | 2851        | C-H symmetric stretching ( $\text{CH}_2$ )            |
|                               | 1468                  | 1467        | 1470        | 1469        | $\nu_3$ , asymmetric C-O stretching mode              |
|                               | 1086                  | 1087        | 1088        | 1087        | $\nu_1$ , symmetric C-O stretching mode               |
|                               | 875                   | 876         | 877         | 876         | $\nu_2$ , $\text{CO}_3$ out of plane deformation mode |
|                               | 746                   | 746         | 746         | 746         | $\nu_4$ , O-C-O bending (in plane deformation) mode   |
|                               |                       |             |             |             |                                                       |

**Table S11.** Assignment of IR bands in the FTIR spectra of precipitate formed in calcium carbonate system containing DMPS liposomes  $c_i(\text{Ca}) = c_i(\text{CO}_3) = 20 \text{ mmol dm}^{-3}$ ,  $\text{pH}_i = 8.15$ ,  $\vartheta / ^\circ\text{C} = 25 \pm 0.1$ .

| Wavenumber / $\text{cm}^{-1}$ | $\gamma$ (DMPS) / ppm |             |             |             | Band assignment |
|-------------------------------|-----------------------|-------------|-------------|-------------|-----------------|
|                               | 2.5                   | 6.25        | 12.5        | 25.0        |                 |
|                               | 3691 - 3104           | 3688 - 3102 | 3675 - 3099 | 3687 - 3100 |                 |
|                               |                       | 2917        | 2913        | 2912        |                 |
|                               |                       | 2849        | 2845        | 2851        |                 |
|                               | 1467                  | 1471        | 1469        | 1469        |                 |
|                               | 1087                  | 1085        | 1082        | 1081        |                 |
|                               | 873                   | 877         | 875         | 875         |                 |
|                               | 746                   | 746         | 746         | 746         |                 |
|                               |                       |             |             |             |                 |



**Table S12.** Assignment of IR bands in the FTIR spectra of precipitate formed in calcium carbonate system containing EPC liposomes.  $c_i(\text{Ca}) = c_i(\text{CO}_3) = 20 \text{ mmol dm}^{-3}$ ,  $\text{pH}_i = 8.15$ ,  $\vartheta / ^\circ\text{C} = 25 \pm 0.1$ .

| Wavenumber / $\text{cm}^{-1}$ | $\gamma$ (EPC) / ppm |             |             |             |                                                       |
|-------------------------------|----------------------|-------------|-------------|-------------|-------------------------------------------------------|
|                               | 2.5                  | 6.25        | 12.5        | 25.0        | Band assignment                                       |
|                               | 3665 - 3091          | 3670 - 3095 | 3669 - 3099 | 3672 - 3088 | O-H stretching mode of $\text{H}_2\text{O}$           |
|                               | 1468                 | 1468        | 1468        | 1469        | $\nu_3$ , asymmetric C-O stretching mode              |
|                               | 1085                 | 1087        | 1085        | 1085        | $\nu_1$ , symmetric C-O stretching mode               |
|                               | 876                  | 873         | 875         | 876         | $\nu_2$ , $\text{CO}_3$ out of plane deformation mode |
|                               | 746                  | 746         | 746         | 746         | $\nu_4$ , O-C-O bending (in plane deformation) mode   |

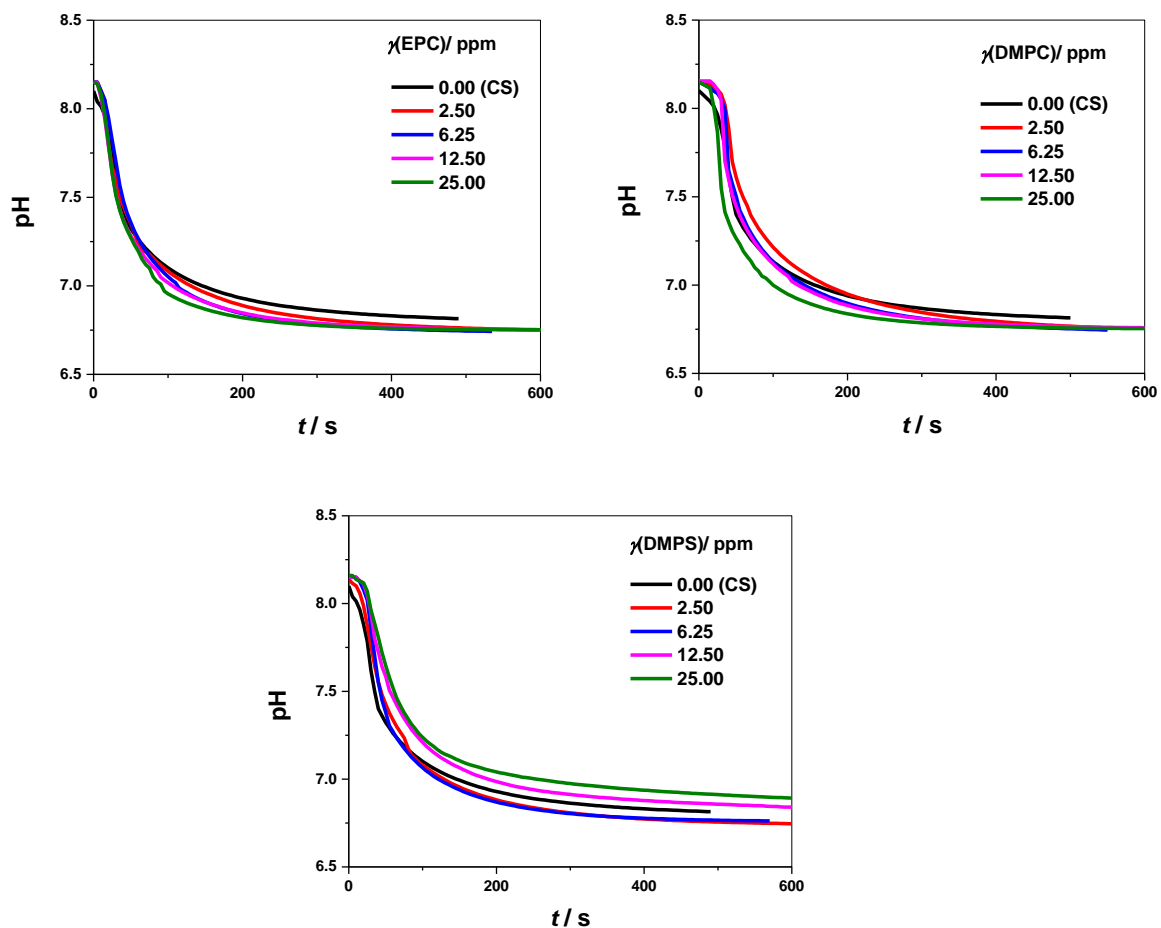

**Figure S6.** Representative pH vs. time curve of  $\text{CaCO}_3$  spontaneous precipitation experiments at different concentration of liposomes:  $2.5 \text{ ppm} < \gamma(\text{lipid}) < 25.0 \text{ ppm}$ .  $c_i(\text{Ca}) = c_i(\text{CO}_3) = 20 \text{ mmol dm}^{-3}$ ,  $\text{pH}_i = 8.15$ ,  $\vartheta / ^\circ\text{C} = 25 \pm 0.1$ .

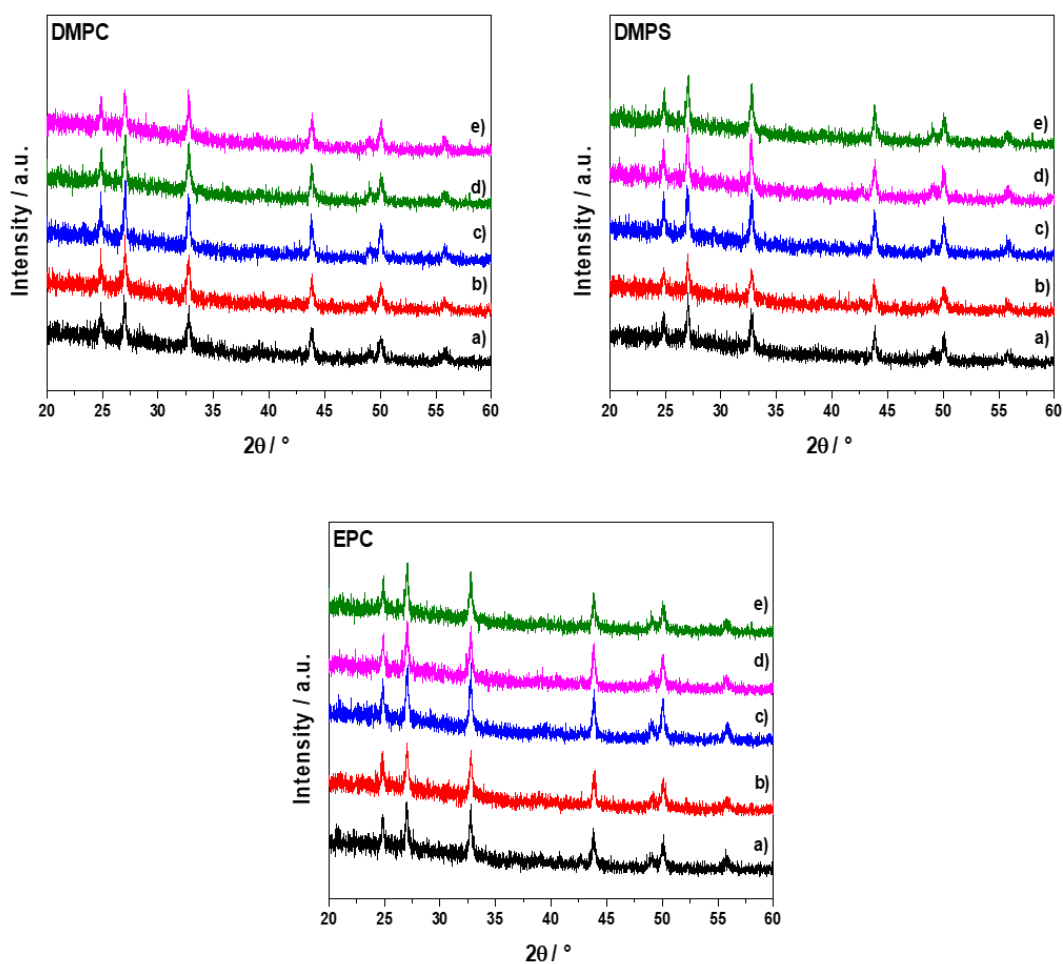

**Figure S7.** PXRD patterns of the precipitate formed after 10 minutes reaction time in the absence (a) and presence of different concentration of liposomes (expressed as lipid concentration): b) 2.50 ppm, c) 6.25 ppm d) 12.50 ppm e) 25.00 ppm.  $c_i(\text{Ca}) = c_i(\text{CO}_3) = 20 \text{ mmol dm}^{-3}$ ,  $\text{pH}_i = 8.15$ ,  $\vartheta / ^\circ\text{C} = 25 \pm 0.1$ .
